# Supplementary material for: DeepMIP: model intercomparison of early Eocene climatic optimum (EECO) large-scale climate features and comparison with proxy data
Source: Copernicus journal article supplement (doi:10.5194/cp-17-203-2021), 2021-01-15
Supplement: Supplementary file 1 [file cp-17-203-2021-supplement.zip]

This supplement contains 2 elements:

(1) A pdf containing supplementary Figures S1 to S10, and Tables S1 to S2.

(2) A .tar.gz file containing the model output used in this paper.

The individual files are in netcdf format.

The naming convention is <MOD>-<EXP>-<VAR>-<VER>.mean\_um\_<INT>\_<DATE>.nc

MOD is the model name, see Section 2.2 in the main paper

EXP is the experiment name, see Table 1 in the main paper

VAR can be:

tas = near-surface air temperature

tos = SST

ts = surface temperature

rEVL = radiative fluxes, where E can be l = longwave or s = shortwave; V can be u = upward or d = downward or n = net, and L can be t = TOA to s = surface.

VER is 1.0 (referring to the version in the DeepMIP model database)

INT is either blank, or = sst\_nn in the case of SST (referring to nearest neighbour interpolation; all other interpolations are carried out using bilinear interpolation)

DATE is 2020-11-19 for all variables.

There are 290 files altogether = 10 variables \* 29 simulations.

5\*CESM + 4\*COS + 6\*GFDL + 4\*HAD + 2\*INM + 3\*IPS + 2\*MIR + 3\*NOR = 29.
