# Supplementary material for: DeepMIP: model intercomparison of early Eocene climatic optimum (EECO) large-scale climate features and comparison with proxy data
Source: Copernicus journal article supplement (doi:10.5194/cp-17-203-2021), 2021-01-15
Supplement: Supplementary file 2 [file cp-17-203-2021-supplement.zip]

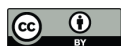

## *Supplement of*

# **DeepMIP: model intercomparison of early Eocene climatic optimum (EECO) large-scale climate features and comparison with proxy data**

**Daniel J. Lunt et al.**

*Correspondence to:* Daniel J. Lunt ([d.j.lunt@bristol.ac.uk](mailto:d.j.lunt@bristol.ac.uk))

- [cp-17-203-2021-supplement-title-page.pdf](#)
- [Supp\\_info](#)
  - [Supp\\_Description.pdf](#)
  - [eocene\\_deepmip\\_figsup\\_2.2.pdf](#)
  - [lunt\\_et\\_al\\_deepmip\\_2020\\_supp.tar.gz](#)

The copyright of individual parts of the supplement might differ from the CC BY 4.0 License.
