# Supplementary material for: DeepMIP: model intercomparison of early Eocene climatic optimum (EECO) large-scale climate features and comparison with proxy data
Source: Copernicus journal article supplement (doi:10.5194/cp-17-203-2021), 2021-01-15
Supplement: Supplementary file 3 [file cp-17-203-2021-supplement.zip]

Supplementary Information For DeepMIP: Model  
intercomparison of early Eocene climatic optimum  
(EECO) large-scale climate features and comparison with  
proxy data

January 12, 2021

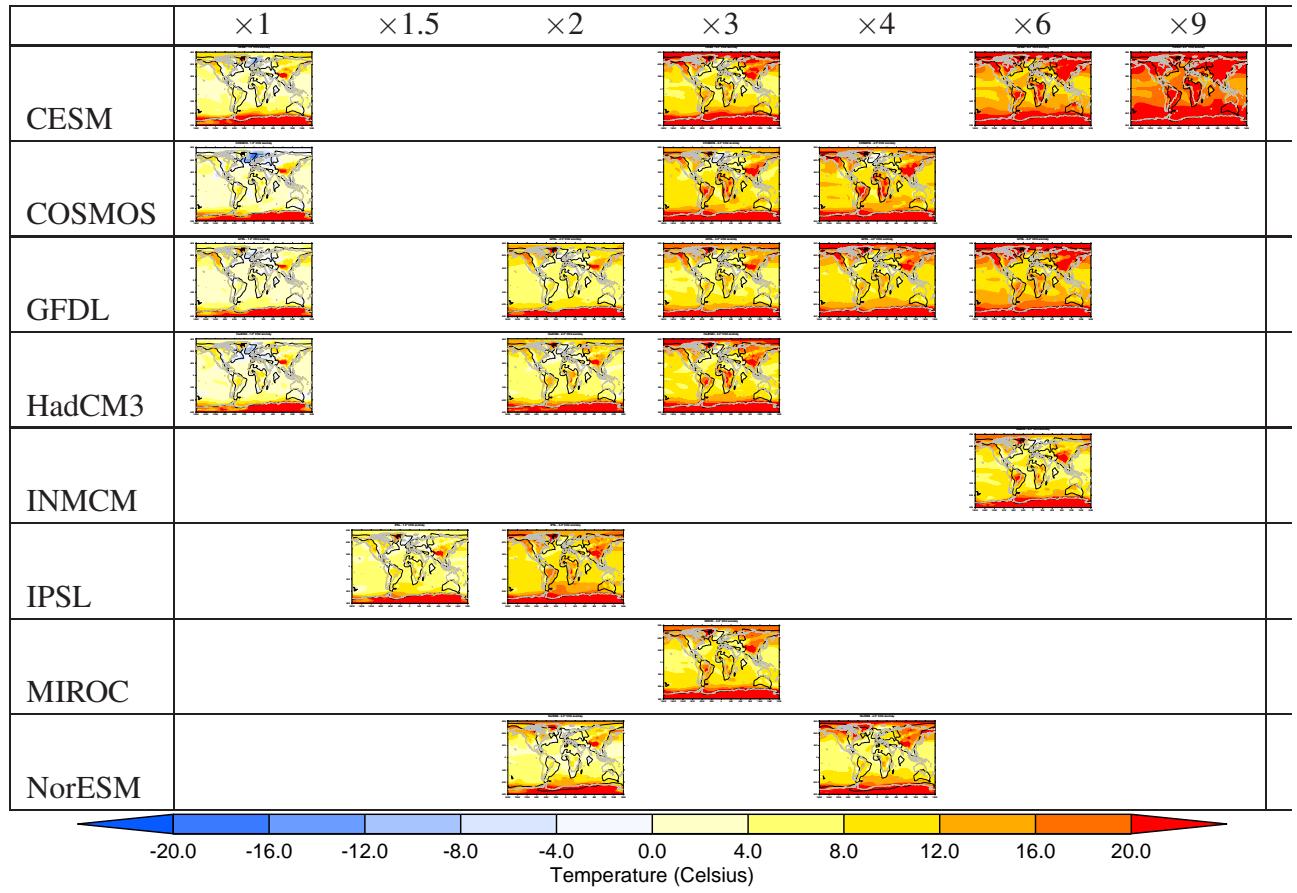

Figure S1: As Figure 3 in the main paper, but the variable plotted is  $GAT_e^m - GAT_p^m$ , and we include Eocene simulations with  $CO_2$  below  $\times 2$ . The Eocene continental outline is shown in black and the modern is in grey.

|        | PI                                                                                 | $\times 1$                                                                        | $\times 1.5$                                                                      | $\times 2$                                                                         | $\times 3$                                                                         | $\times 4$                                                                           | $\times 6$                                                                          | $\times 9$                                                                          |
|--------|------------------------------------------------------------------------------------|-----------------------------------------------------------------------------------|-----------------------------------------------------------------------------------|------------------------------------------------------------------------------------|------------------------------------------------------------------------------------|--------------------------------------------------------------------------------------|-------------------------------------------------------------------------------------|-------------------------------------------------------------------------------------|
| CESM   | 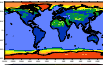  |  |                                                                                   |                                                                                    |  |                                                                                      |  |  |
| COSMOS |   |  |                                                                                   |                                                                                    |  |   |                                                                                     |                                                                                     |
| GFDL   |   |  |                                                                                   |   |  |   |  |                                                                                     |
| HadCM3 |   |  |                                                                                   |   |  |                                                                                      |                                                                                     |                                                                                     |
| INMCM  |   |                                                                                   |                                                                                   |                                                                                    |                                                                                    |                                                                                      |  |                                                                                     |
| IPSL   |   |                                                                                   |  |   |                                                                                    |                                                                                      |                                                                                     |                                                                                     |
| MIROC  |   |                                                                                   |                                                                                   |                                                                                    |  |                                                                                      |                                                                                     |                                                                                     |
| NorESM |  |                                                                                   |                                                                                   |  |                                                                                    |  |                                                                                     |                                                                                     |

Figure S2: Surface albedo in each of the DeepMIP preindustrial and Eocene simulations.

|        | PI                                                                                 | $\times 1$                                                                        | $\times 1.5$                                                                      | $\times 2$                                                                         | $\times 3$                                                                         | $\times 4$                                                                           | $\times 6$                                                                          | $\times 9$                                                                          |
|--------|------------------------------------------------------------------------------------|-----------------------------------------------------------------------------------|-----------------------------------------------------------------------------------|------------------------------------------------------------------------------------|------------------------------------------------------------------------------------|--------------------------------------------------------------------------------------|-------------------------------------------------------------------------------------|-------------------------------------------------------------------------------------|
| CESM   | 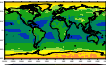  |  |                                                                                   |                                                                                    |  |                                                                                      |  |  |
| COSMOS |   |  |                                                                                   |                                                                                    |  |   |                                                                                     |                                                                                     |
| GFDL   |   |  |                                                                                   |   |  |   |  |                                                                                     |
| HadCM3 |   |  |                                                                                   |   |  |                                                                                      |                                                                                     |                                                                                     |
| INMCM  |   |                                                                                   |                                                                                   |                                                                                    |                                                                                    |                                                                                      |  |                                                                                     |
| IPSL   |   |                                                                                   |  |   |                                                                                    |                                                                                      |                                                                                     |                                                                                     |
| MIROC  |   |                                                                                   |                                                                                   |                                                                                    |  |                                                                                      |                                                                                     |                                                                                     |
| NorESM |  |                                                                                   |                                                                                   |  |                                                                                    |  |                                                                                     |                                                                                     |

Figure S3: Planetary albedo in each of the DeepMIP preindustrial and Eocene simulations.



|        | PI                                                                                 | $\times 1$                                                                        | $\times 1.5$                                                                      | $\times 2$                                                                         | $\times 3$                                                                         | $\times 4$                                                                           | $\times 6$                                                                          | $\times 9$                                                                          |
|--------|------------------------------------------------------------------------------------|-----------------------------------------------------------------------------------|-----------------------------------------------------------------------------------|------------------------------------------------------------------------------------|------------------------------------------------------------------------------------|--------------------------------------------------------------------------------------|-------------------------------------------------------------------------------------|-------------------------------------------------------------------------------------|
| CESM   | 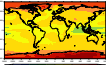  |  |                                                                                   |                                                                                    |  |                                                                                      |  |  |
| COSMOS |   |  |                                                                                   |                                                                                    |  |   |                                                                                     |                                                                                     |
| GFDL   |   |  |                                                                                   |   |  |   |  |                                                                                     |
| HadCM3 |   |  |                                                                                   |   |  |                                                                                      |                                                                                     |                                                                                     |
| INMCM  |   |                                                                                   |                                                                                   |                                                                                    |                                                                                    |                                                                                      |  |                                                                                     |
| IPSL   |   |                                                                                   |  |   |                                                                                    |                                                                                      |                                                                                     |                                                                                     |
| MIROC  |   |                                                                                   |                                                                                   |                                                                                    |  |                                                                                      |                                                                                     |                                                                                     |
| NorESM |  |                                                                                   |                                                                                   |  |                                                                                    |  |                                                                                     |                                                                                     |

Figure S4: Emissivity in each of the DeepMIP preindustrial and Eocene simulations.

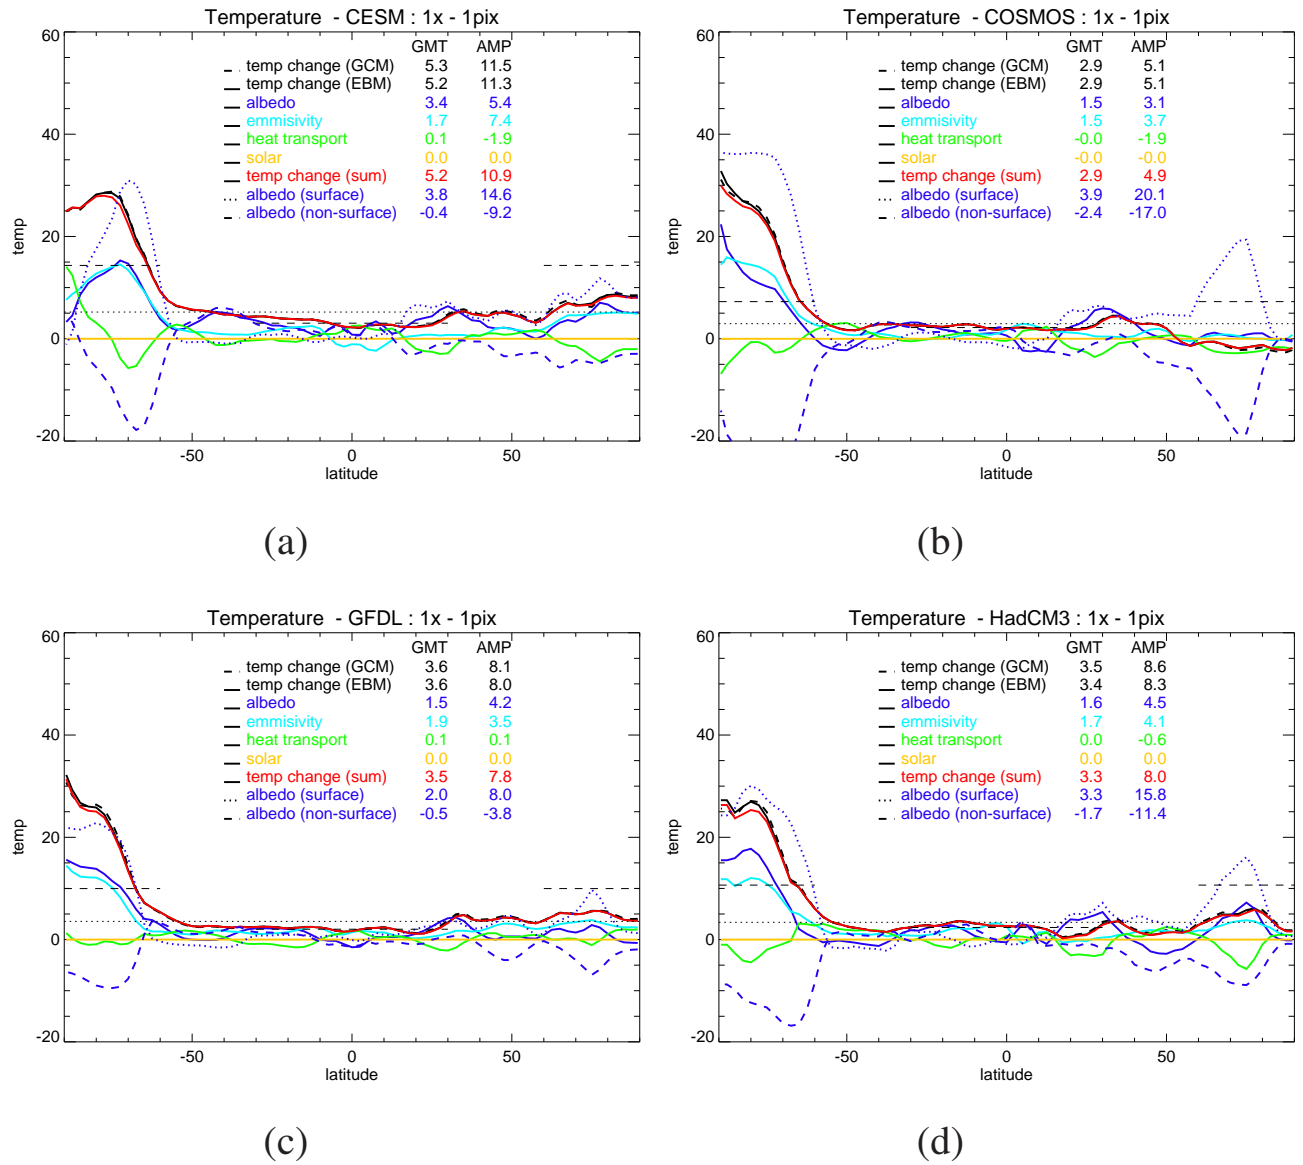

Figure S5: As Figure 4 in the main paper, but for  $\times 1$  minus preindustrial rather than  $\times 3$  minus preindustrial, and only for those models that carried out simulations at  $\times 1$  and  $\times 3$ .

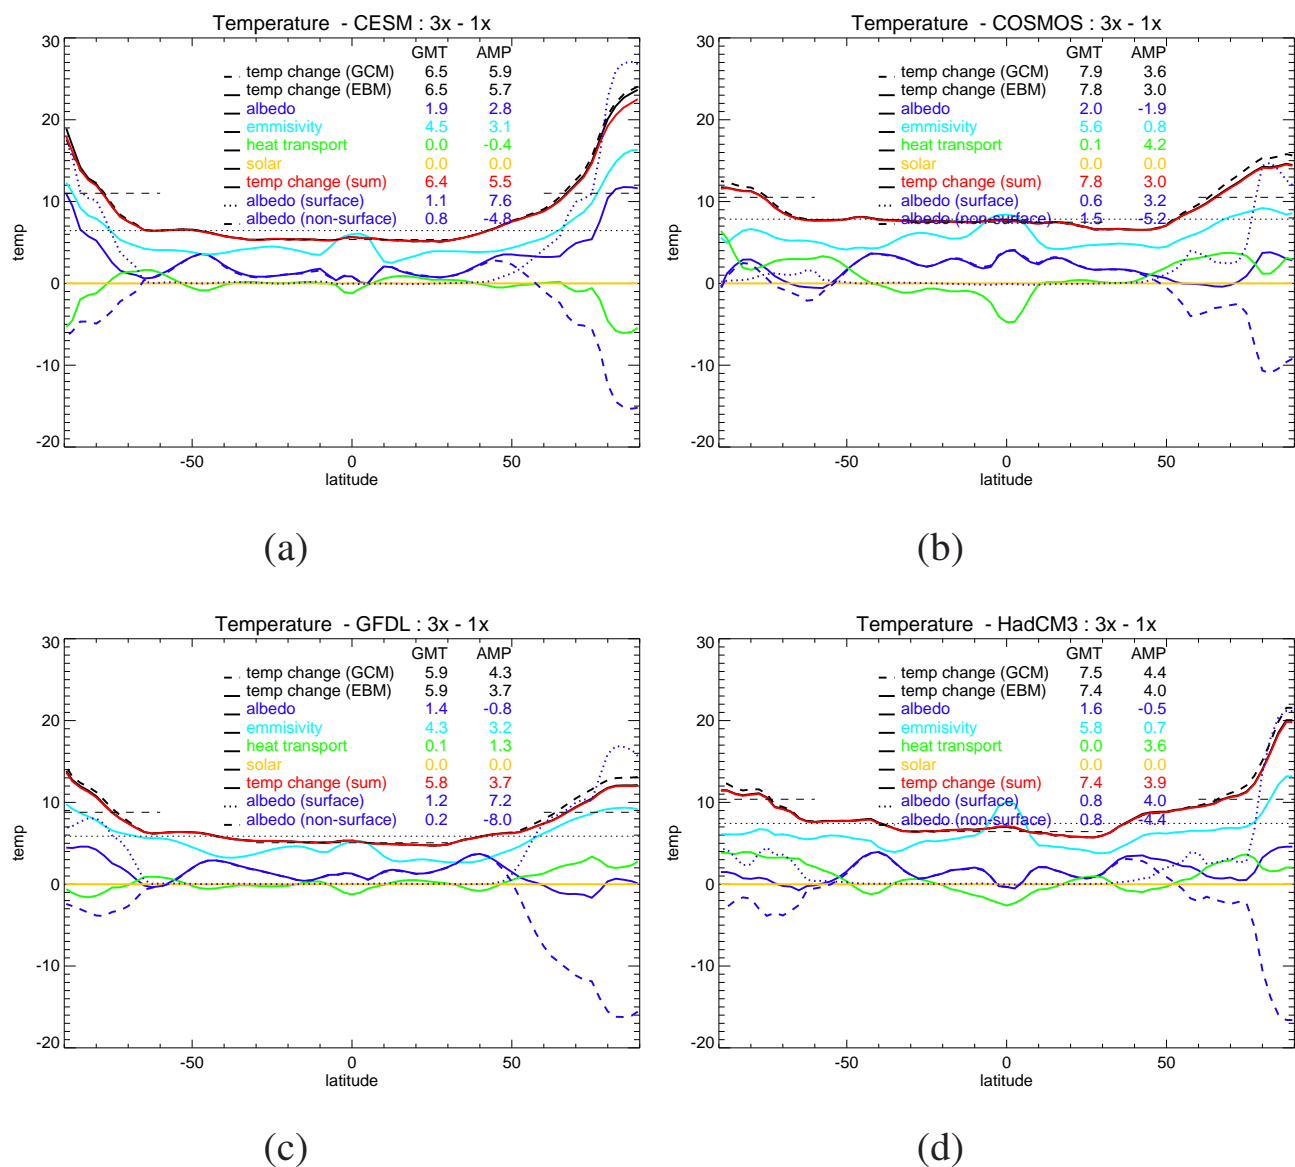

Figure S6: As Figure 4 in the main paper, but for  $\times 3$  minus  $\times 1$  rather than  $\times 3$  minus preindustrial, and only for those models that carried out simulations at  $\times 1$  and  $\times 3$ .

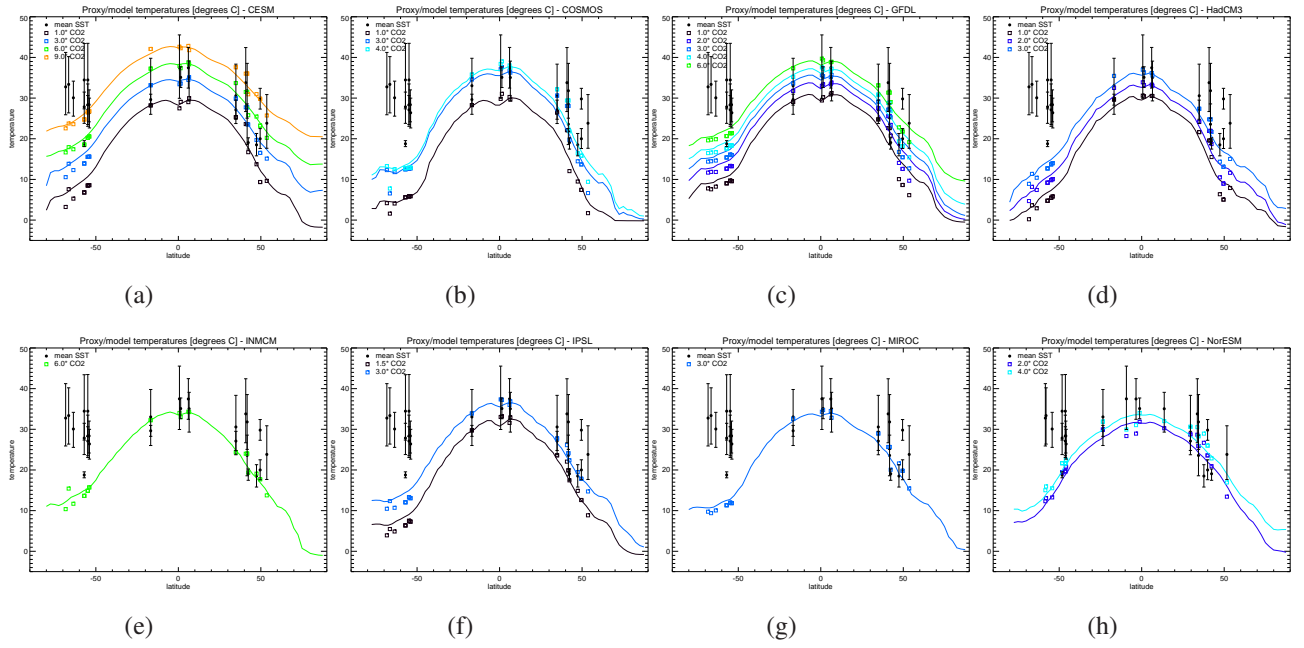

Figure S7: Zonal mean Eocene sea-surface temperatures (SST) in each DeepMIP model, for each CO<sub>2</sub> simulation carried out. EECO SST proxies from [Hollis *et al.*(2019)] are shown as black circles with error bars, and the modelled SST at these locations are shown as coloured squares.

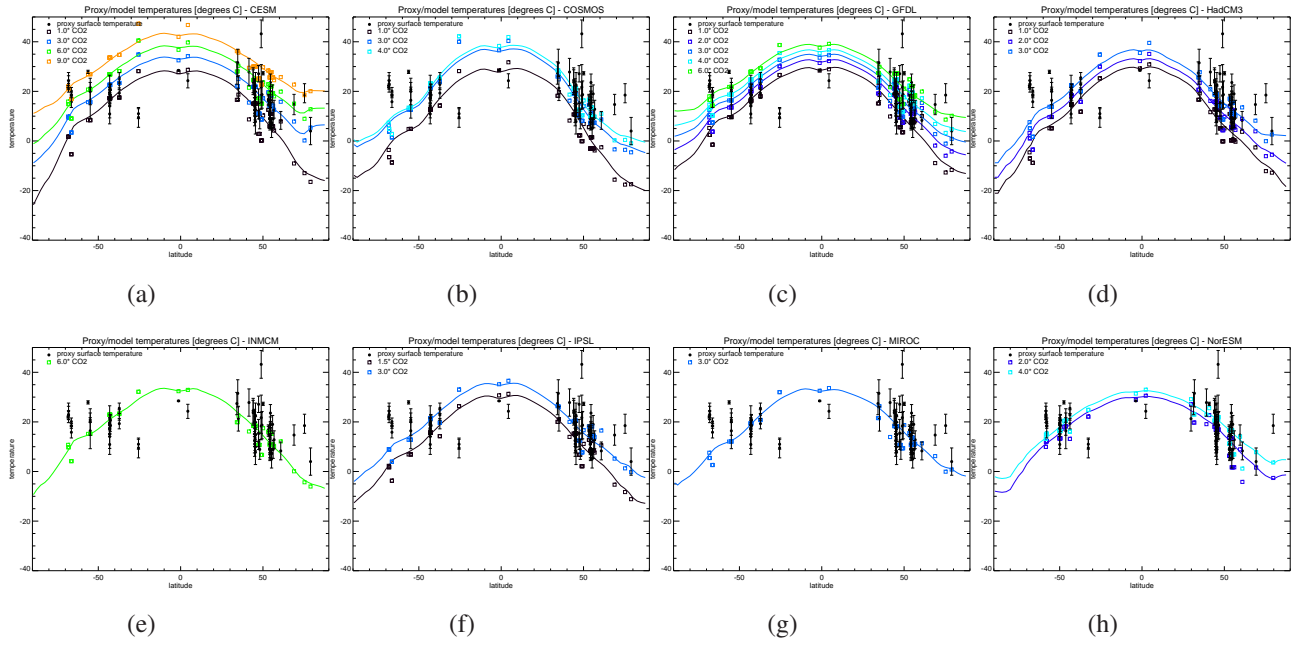

Figure S8: Zonal mean Eocene near-surface air temperatures (SAT) in each DeepMIP model, for each CO<sub>2</sub> simulation carried out. EECO SAT proxies from [Hollis *et al.*(2019)] are shown as black circles with error bars, and the modelled SAT at these locations are shown as coloured squares.

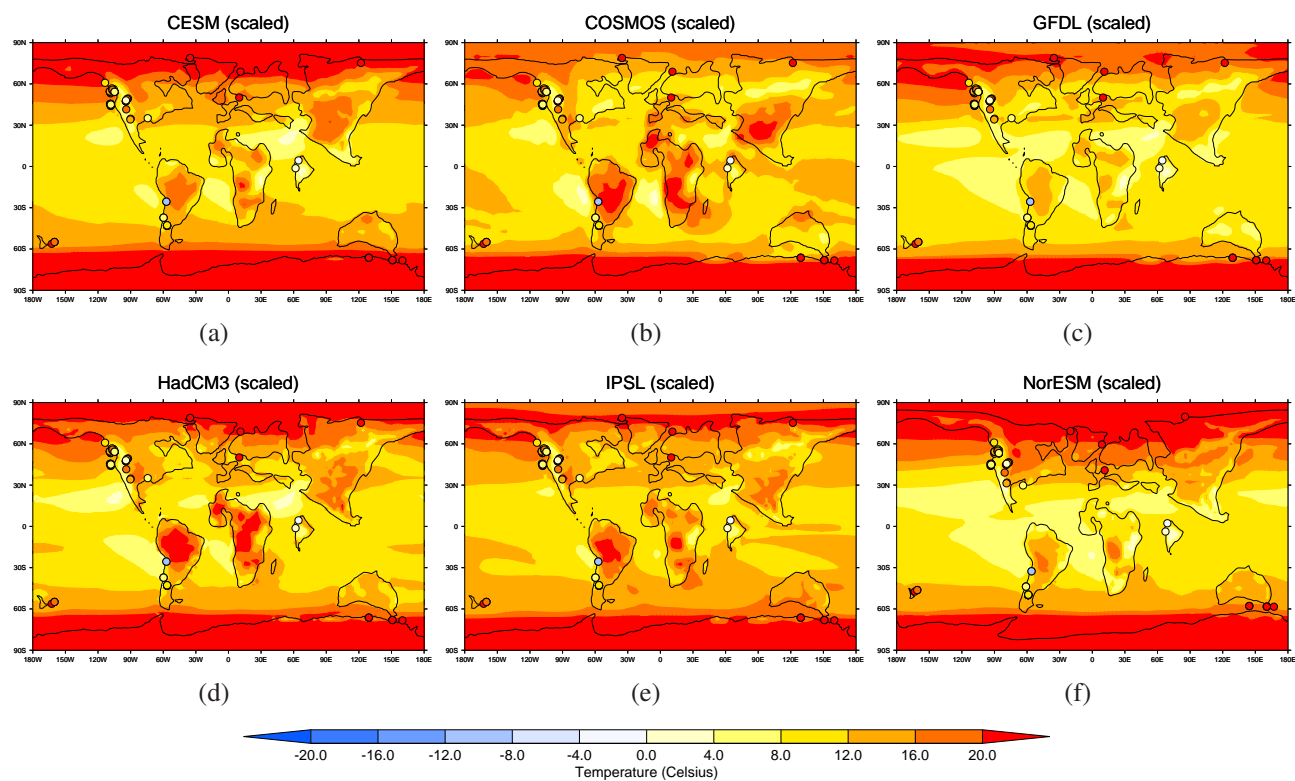

Figure S9: As Figure 5 in the main paper, but for near-surface air temperatures from models and proxies instead of SSTs.

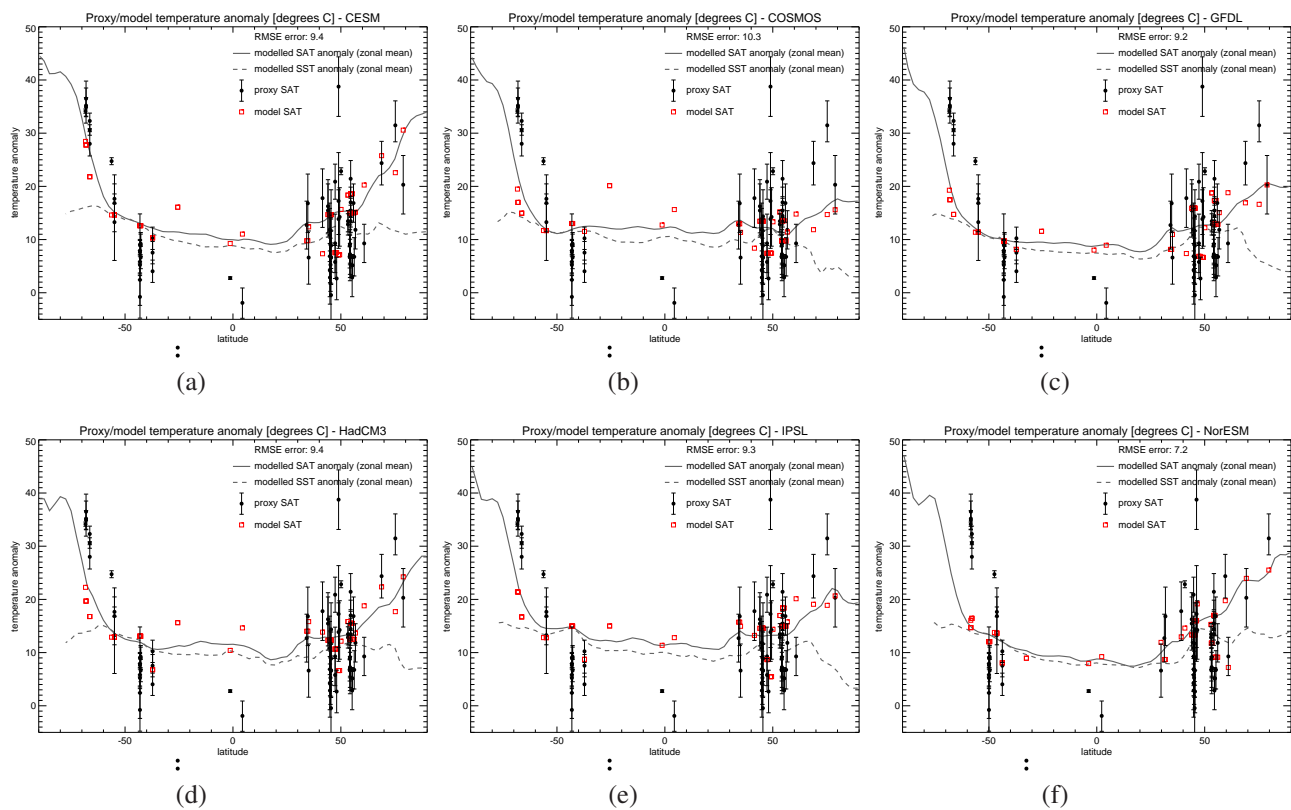

Figure S10: As Figure 6 in the main paper, but for near-surface air temperatures from models and proxies instead of SSTs.

| Model  | CO <sub>2</sub> | length [years] | TOA [Wm <sup>-2</sup> ]      | Trend [°C/century]            | PI TOA [Wm <sup>-2</sup> ] | PI trend [°C/century] |
|--------|-----------------|----------------|------------------------------|-------------------------------|----------------------------|-----------------------|
| CESM   | ×1,×3,×6,×9     | 2000+          | −0.25,−0.32,0.34,0.64        | 0.06,−0.11,−0.01,0.04         | −0.05                      | −0.01                 |
| COSMOS | ×1,×3,×4        | 8500,9500,8500 | 1.91,1.78,1.95               | 0.07,0.04,−0.26               | 1.75                       | −0.05                 |
| GFDL   | ×1,×2,×3,×4,×6  | 6000           | 0.10,−0.08,−0.14,−0.19,−0.28 | 0.018,0.049,−0.016,0.05,0.011 | 0.31                       | 0.012                 |
| HadCM3 | ×1,×2,×3        | >4000 + 2950   | −0.02,−0.08,−0.08            | −0.06,−0.18,0.21              | −0.08                      | −0.04                 |
| INMCM  | ×6              | 1150           | 2.87                         | −0.1                          | 4.37                       | 0.01                  |
| IPSL   | ×1.5,×3         | 4000           | 0.59,0.76                    | 0.05,0.04                     | 0.08                       | −0.01                 |
| MIROC  | ×3              | 5000           | 0.93                         | 0.08                          | 0.96                       | 0.00                  |
| NorESM | ×2,×4           | 2100,2000      | 0.03,0.24                    | 0.00,0.02                     | −0.02                      | −0.01                 |

Table S1: Information on spinup of the DeepMIP Eocene simulations, including the length of simulation, the climatological TOA energy imbalance at the end of the simulation, and global mean near-surface air temperature trend. The temperature trend is calculated as the average of the final 100 years of the simulation minus the 100 years before that, to give a trend per century. The exception is HadCM3 for which the trend is calculated as the average of the final 50 years of the simulation minus the 50 years before that, and multiplied by two to give a trend per century. Also shown are the TOA imbalance [Wm<sup>-2</sup>] and trend [°C/century] for the associated preindustrial (PI) simulation. The PI trends are calculated in the same way as for the Eocene trends, apart from for NorESM, which is a reported value calculated over the last 1000 years, and divided by 10 to give a trend per century.



| surface type           | region [° latitude] | mean temperature difference [°C] |
|------------------------|---------------------|----------------------------------|
| global                 | -90 to 90           | 14.0989                          |
| global                 | -30 to 30           | 10.9590                          |
| global                 | +90 to +-60         | 12.9766                          |
| global                 | -90 to -60          | 30.4559                          |
| global                 | -60 to -30          | 13.5576                          |
| global                 | -30 to 0            | 11.4765                          |
| global                 | 0 to 30             | 10.5202                          |
| global                 | 30 to 60            | 14.6240                          |
| global                 | 60 to 90            | 21.5664                          |
| land                   | -90 to 90           | 16.4419                          |
| land                   | -30 to 30           | 14.6890                          |
| land                   | +90 to +-60         | 14.2471                          |
| land                   | -90 to -60          | 41.0243                          |
| land                   | -60 to -30          | 9.48574                          |
| land                   | -30 to 0            | 15.8816                          |
| land                   | 0 to 30             | 13.7946                          |
| land                   | 30 to 60            | 15.7113                          |
| land                   | 60 to 90            | 20.8675                          |
| ocean                  | -90 to 90           | 13.0000                          |
| ocean                  | -30 to 30           | 9.97039                          |
| ocean                  | +90 to +-60         | 12.3579                          |
| ocean                  | -90 to -60          | 22.8349                          |
| ocean                  | -60 to -30          | 13.7086                          |
| ocean                  | -30 to 0            | 10.3929                          |
| ocean                  | 0 to 30             | 9.60428                          |
| ocean                  | 30 to 60            | 12.9857                          |
| ocean                  | 60 to 90            | 22.4782                          |
| ocean (seaice=-1.8 °C) | -90 to 90           | 13.0078                          |
| ocean (seaice=-1.8 °C) | -30 to 30           | 9.97039                          |
| ocean (seaice=-1.8 °C) | +90 to +-60         | 12.3661                          |
| ocean (seaice=-1.8 °C) | -90 to -60          | 22.8370                          |
| ocean (seaice=-1.8 °C) | -60 to -30          | 13.7086                          |
| ocean (seaice=-1.8 °C) | -30 to 0            | 10.3929                          |
| ocean (seaice=-1.8 °C) | 0 to 30             | 9.60428                          |
| ocean (seaice=-1.8 °C) | 30 to 60            | 12.9857                          |
| ocean (seaice=-1.8 °C) | 60 to 90            | 22.6652                          |

Table S2: Table of metrics for the ensemble of post-EoMIP simulations that were carried out at CO<sub>2</sub> concentrations that fall within the observations; i.e. CCSM.K, GFDL (at ×4 and ×6), CESM (at ×6 and ×9), NorESM, COSMOS, and INMCM. Mean near-surface air temperature difference is expressed as Eocene minus preindustrial.

## References

- [Hollis *et al.*(2019)] Hollis, C. J., Dunkley Jones, T., Anagnostou, E., Bijl, P. K., Cramwinckel, M. J., Cui, Y., Dickens, G. R., Edgar, K. M., Eley, Y., Evans, D., Foster, G. L., Frieling, J., Inglis, G. N., Kennedy, E. M., Kozdon, R., Lauretano, V., Lear, C. H., Littler, K., Lourens, L., Meckler, A. N., Naafs, B. D. A., Pälike, H., Pancost, R. D., Pearson, P. N., Röhl, U., Royer, D. L., Salzmänn, U., Schubert, B. A., Seebeck, H., Sluijs, A., Speijer, R. P., Stassen, P., Tierney, J., Tripathi, A., Wade, B., Westerhold, T., Witkowski, C., Zachos, J. C., Zhang, Y. G., Huber, M., and Lunt, D. J. (2019). The deepmip contribution to pmip4: methodologies for selection, compilation and analysis of latest paleocene and early eocene climate proxy data, incorporating version 0.1 of the deepmip database. *Geoscientific Model Development*, **12**(7), 3149–3206.
